# Supplementary material for: Comparative analysis of different survey methods for monitoring fish assemblages in coastal habitats
Source: PeerJ. 2016 Mar 21;4:e1832. doi: 10.7717/peerj.1832 (PMC4806602; doi:10.7717/peerj.1832)
Supplement: Supplemental Information 2 [file peerj-04-1832-s008.xlsx]

## Sheet: Fish deep data
NOTES: This is the Transect data collected in the fall of 2006
SPP	Tansect	ABUN	SIZE	ID	CANOP	LOC	LEVEL	REG	SITE	OCEAN	BLOCK	LAT	LON	DATE	SEAS	YEAR	TIME	HTIDE	TLENGTH	TWIDTH	LIGHT	EXPOS	BTYPE	COMM
Species	Tansect	Abundance	Size	ID	Canopy	Location	Level of Eutrophication	Region	Site	Ocean Region	Block	Latitude	Longitude	Date	Season	Year	Time	High Tide	Transect Length	Swath width	Light	Exposure	Bottom Type	Comments
		No. Ind	cm																m	m
		whole transect		SiteSppLocD/NM/DD/YYYY	Species									M/DD/YYYY		YYYY	hh:mm:ss	hh:mm:ss
String	String	Number	Number	String	String	String	String	String	String	String	String	String	String	String	String	String	String	String	Number	Number	String	String	String	String
Categorical	Numerical	Numerical	Numerical	Categorical	Categorical	Categorical	Categorical	Categorical	Categorical	Categorical	Categorical	Numerical	Numerical	Numerical	Categorical	Categorical	Numerical	Numerical	Numerical	Numerical	Categorical	Categorical	Categorical	Notes
1		1	2	2	3	4	5	6	7	8	9	10	11	12	13	14	15	16	17	18	19	20	21	22
Attributes	Attrubutes	Data	Data	Attributes	Attributes	Attributes	Attributes	Attributes	Attributes	Attributes	Attributes	Attributes	Attributes	Attributes	Attributes	Attributes	Attributes	Attributes	Attributes	Attributes	Attributes	Attributes	Attributes	Attributes
Atlantic Silver side (Menidia menidia)	1	554	6	CH(1)080713TD	Seagrass	In	H	Gulf Region	Cocagne 1	Atlantic	2	N 46°36.72	W 64°61.73	2013-08-07	Summer	2013	11:15:00	06:37:00	50	4	D	sheltered	mud	Diver: RM; Shore: HL
4-Spine Stickle bach (Apeltes quadracus )	1	1	3	CH(1)080713TD	Seagrass	In	H	Gulf Region	Cocagne 2	Atlantic	2	N 46°36.72	W 64°61.73	2013-08-07	Summer	2013	11:15:00	06:37:00	50	4	D	sheltered	mud	Diver: RM; Shore: HL
9-Spine Stickleback (Pungitius pungitius)	1	1	6	CH(1)080713TD	Seagrass	In	H	Gulf Region	Cocagne 3	Atlantic	2	N 46°36.72	W 64°61.73	2013-08-07	Summer	2013	11:15:00	06:37:00	50	4	D	sheltered	mud	Diver: RM; Shore: HL
9-Spine Stickleback (Pungitius pungitius)	1	2	2.5	CH(1)080713TD	Seagrass	In	H	Gulf Region	Cocagne 4	Atlantic	2	N 46°36.72	W 64°61.73	2013-08-07	Summer	2013	11:15:00	06:37:00	50	4	D	sheltered	mud	Diver: RM; Shore: HL
Mummichog (Fundulus heteroclitus)	1	2	10	CH(1)080713TD	Seagrass	In	H	Gulf Region	Cocagne 5	Atlantic	2	N 46°36.72	W 64°61.73	2013-08-07	Summer	2013	11:15:00	06:37:00	50	4	D	sheltered	mud	Diver: RM; Shore: HL
Mummichog (Fundulus heteroclitus)	1	1	3	CH(1)080713TD	Seagrass	In	H	Gulf Region	Cocagne 6	Atlantic	2	N 46°36.72	W 64°61.73	2013-08-07	Summer	2013	11:15:00	06:37:00	50	4	D	sheltered	mud	Diver: RM; Shore: HL
Flounder sp. (Pleuronectes sp.)	1	1	5	CH(1)080713TD	Seagrass	In	H	Gulf Region	Cocagne 7	Atlantic	2	N 46°36.72	W 64°61.73	2013-08-07	Summer	2013	11:15:00	06:37:00	50	4	D	sheltered	mud	Diver: RM; Shore: HL
Atlantic Silver side (Menidia menidia)	2	260	6	CH(1)080713TD	Seagrass	In	H	Gulf Region	Cocagne 8	Atlantic	2	N 46°36.72	W 64°61.73	2013-08-07	Summer	2013	11:15:00	06:37:00	50	4	D	sheltered	mud	Diver: RM; Shore: HL
4-Spine Stickle bach (Apeltes quadracus )	2	1	4	CH(1)080713TD	Seagrass	In	H	Gulf Region	Cocagne 9	Atlantic	2	N 46°36.72	W 64°61.73	2013-08-07	Summer	2013	11:15:00	06:37:00	50	4	D	sheltered	mud	Diver: RM; Shore: HL
4-Spine Stickle bach (Apeltes quadracus )	2	1	6	CH(1)080713TD	Seagrass	In	H	Gulf Region	Cocagne 10	Atlantic	2	N 46°36.72	W 64°61.73	2013-08-07	Summer	2013	11:15:00	06:37:00	50	4	D	sheltered	mud	Diver: RM; Shore: HL
4-Spine Stickle bach (Apeltes quadracus )	2	2	3	CH(1)080713TD	Seagrass	In	H	Gulf Region	Cocagne 11	Atlantic	2	N 46°36.72	W 64°61.73	2013-08-07	Summer	2013	11:15:00	06:37:00	50	4	D	sheltered	mud	Diver: RM; Shore: HL
4-Spine Stickle bach (Apeltes quadracus )	2	1	2	CH(1)080713TD	Seagrass	In	H	Gulf Region	Cocagne 12	Atlantic	2	N 46°36.72	W 64°61.73	2013-08-07	Summer	2013	11:15:00	06:37:00	50	4	D	sheltered	mud	Diver: RM; Shore: HL
4-Spine Stickle bach (Apeltes quadracus )	2	1	5	CH(1)080713TD	Seagrass	In	H	Gulf Region	Cocagne 13	Atlantic	2	N 46°36.72	W 64°61.73	2013-08-07	Summer	2013	11:15:00	06:37:00	50	4	D	sheltered	mud	Diver: RM; Shore: HL
Flounder sp. (Pleuronectes sp.)	2	1	6	CH(1)080713TD	Seagrass	In	H	Gulf Region	Cocagne 14	Atlantic	2	N 46°36.72	W 64°61.73	2013-08-07	Summer	2013	11:15:00	06:37:00	50	4	D	sheltered	mud	Diver: RM; Shore: HL
Atlantic Silver side (Menidia menidia)	1	2	5	CH(1)080713TN	Seagrass	In	H	Gulf Region	Cocagne 15	Atlantic	2	N 46°36.72	W 64°61.73	2013-08-07	Summer	2013	01:00:00	06:37:00	50	4	N	sheltered	mud	Diver: RM; Shore: HL
4-Spine Stickle bach (Apeltes quadracus )	1	2	2.5	CH(1)080713TN	Seagrass	In	H	Gulf Region	Cocagne 16	Atlantic	2	N 46°36.72	W 64°61.73	2013-08-07	Summer	2013	01:00:00	06:37:00	50	4	N	sheltered	mud	Diver: RM; Shore: HL
4-Spine Stickle bach (Apeltes quadracus )	1	2	4	CH(1)080713TN	Seagrass	In	H	Gulf Region	Cocagne 17	Atlantic	2	N 46°36.72	W 64°61.73	2013-08-07	Summer	2013	01:00:00	06:37:00	50	4	N	sheltered	mud	Diver: RM; Shore: HL
Mud Crab (Panopeus sp.)	1	6	2	CH(1)080713TN	Seagrass	In	H	Gulf Region	Cocagne 18	Atlantic	2	N 46°36.72	W 64°61.73	2013-08-07	Summer	2013	01:00:00	06:37:00	50	4	N	sheltered	mud	Diver: RM; Shore: HL
Mud Crab (Panopeus sp.)	1	4	3	CH(1)080713TN	Seagrass	In	H	Gulf Region	Cocagne 19	Atlantic	2	N 46°36.72	W 64°61.73	2013-08-07	Summer	2013	01:00:00	06:37:00	50	4	N	sheltered	mud	Diver: RM; Shore: HL
Mud Crab (Panopeus sp.)	2	9	2	CH(1)080713TN	Seagrass	In	H	Gulf Region	Cocagne 20	Atlantic	2	N 46°36.72	W 64°61.73	2013-08-07	Summer	2013	01:00:00	06:37:00	50	4	N	sheltered	mud	Diver: RM; Shore: HL
Mud Crab (Panopeus sp.)	2	10	1	CH(1)080713TN	Seagrass	In	H	Gulf Region	Cocagne 21	Atlantic	2	N 46°36.72	W 64°61.73	2013-08-07	Summer	2013	01:00:00	06:37:00	50	4	N	sheltered	mud	Diver: RM; Shore: HL
Atlantic Silver side (Menidia menidia)	2	5	5	CH(1)080713TN	Seagrass	In	H	Gulf Region	Cocagne 22	Atlantic	2	N 46°36.72	W 64°61.73	2013-08-07	Summer	2013	01:00:00	06:37:00	50	4	N	sheltered	mud	Diver: RM; Shore: HL
3-Spined Stickleback (Gasterosteus aculeatus)	2	1	3	CH(1)080713TN	Seagrass	In	H	Gulf Region	Cocagne 23	Atlantic	2	N 46°36.72	W 64°61.73	2013-08-07	Summer	2013	01:00:00	06:37:00	50	4	N	sheltered	mud	Diver: RM; Shore: HL
Green Crab (Carcinus maenas)	2	1	7	CH(1)080713TN	Seagrass	In	H	Gulf Region	Cocagne 24	Atlantic	2	N 46°36.72	W 64°61.73	2013-08-07	Summer	2013	01:00:00	06:37:00	50	4	N	sheltered	mud	Diver: RM; Shore: HL
Juvenille fish larva	2	1	2	CH(1)080713TN	Seagrass	In	H	Gulf Region	Cocagne 25	Atlantic	2	N 46°36.72	W 64°61.73	2013-08-07	Summer	2013	01:00:00	06:37:00	50	4	N	sheltered	mud	Diver: RM; Shore: HL
Atlantic Silver side (Menidia menidia)	1	2	9	BB080813TD	Seagrass	In	H	Gulf Region	Bouctouche	Atlantic	2	N 46°49'97	W 64°67'64	2013-08-08	Summer	2013	10:30:00	07:23:00	50	4	D	sheltered	mud	Diver: RM; Shore: HL
Atlantic Silver side (Menidia menidia)	1	161	6	BB080813TD	Seagrass	In	H	Gulf Region	Bouctouche	Atlantic	2	N 46°49'97	W 64°67'64	2013-08-08	Summer	2013	10:30:00	07:23:00	50	4	D	sheltered	mud	Diver: RM; Shore: HL
4-Spine Stickle bach (Apeltes quadracus )	1	1	4	BB080813TD	Seagrass	In	H	Gulf Region	Bouctouche	Atlantic	2	N 46°49'97	W 64°67'64	2013-08-08	Summer	2013	10:30:00	07:23:00	50	4	D	sheltered	mud	Diver: RM; Shore: HL
4-Spine Stickle bach (Apeltes quadracus )	2	2	3	BB080813TD	Seagrass	In	H	Gulf Region	Bouctouche	Atlantic	2	N 46°49'97	W 64°67'64	2013-08-08	Summer	2013	10:30:00	07:23:00	50	4	D	sheltered	mud	Diver: RM; Shore: HL
9-Spine Stickleback (Pungitius pungitius)	1	4	3	BB080813TD	Seagrass	In	H	Gulf Region	Bouctouche	Atlantic	2	N 46°49'97	W 64°67'64	2013-08-08	Summer	2013	10:30:00	07:23:00	50	4	D	sheltered	mud	Diver: RM; Shore: HL
Mummichog (Fundulus heteroclitus)	1	1	3	BB080813TD	Seagrass	In	H	Gulf Region	Bouctouche	Atlantic	2	N 46°49'97	W 64°67'64	2013-08-08	Summer	2013	10:30:00	07:23:00	50	4	D	sheltered	mud	Diver: RM; Shore: HL
Mud Crab (Panopeus sp.)	1	6	3	BB080813TD	Seagrass	In	H	Gulf Region	Bouctouche	Atlantic	2	N 46°49'98	W 64°67'65	2013-08-09	Summer	2013	10:30:00	07:23:00	50	4	D	sheltered	mud	Diver: RM; Shore: HL
Mud Crab (Panopeus sp.)	1	1	2	BB080813TD	Seagrass	In	H	Gulf Region	Bouctouche	Atlantic	2	N 46°49'97	W 64°67'64	2013-08-08	Summer	2013	10:30:00	07:23:00	50	4	D	sheltered	mud	Diver: RM; Shore: HL
Mud Crab (Panopeus sp.)	1	1	3	BB080813TD	Seagrass	In	H	Gulf Region	Bouctouche	Atlantic	2	N 46°49'97	W 64°67'64	2013-08-08	Summer	2013	10:30:00	07:23:00	50	4	D	sheltered	mud	Diver: RM; Shore: HL
Atlantic Silver side (Menidia menidia)	2	161	6	BB080813TD	Seagrass	In	H	Gulf Region	Bouctouche	Atlantic	2	N 46°49'97	W 64°67'64	2013-08-08	Summer	2013	10:30:00	07:23:00	50	4	D	sheltered	mud	Diver: RM; Shore: HL
4-Spine Stickle bach (Apeltes quadracus )	2	1	4	BB080813TD	Seagrass	In	H	Gulf Region	Bouctouche	Atlantic	2	N 46°49'97	W 64°67'64	2013-08-08	Summer	2013	10:30:00	07:23:00	50	4	D	sheltered	mud	Diver: RM; Shore: HL
4-Spine Stickle bach (Apeltes quadracus )	2	2	3	BB080813TD	Seagrass	In	H	Gulf Region	Bouctouche	Atlantic	2	N 46°49'97	W 64°67'64	2013-08-08	Summer	2013	10:30:00	07:23:00	50	4	D	sheltered	mud	Diver: RM; Shore: HL
Mummichog (Fundulus heteroclitus)	2	1	2.5	BB080813TD	Seagrass	In	H	Gulf Region	Bouctouche	Atlantic	2	N 46°49'97	W 64°67'64	2013-08-08	Summer	2013	10:30:00	07:23:00	50	4	D	sheltered	mud	Diver: RM; Shore: HL
Mud Crab (Panopeus sp.)	2	1	3	BB080813TD	Seagrass	In	H	Gulf Region	Bouctouche	Atlantic	2	N 46°49'97	W 64°67'64	2013-08-08	Summer	2013	10:30:00	07:23:00	50	4	D	sheltered	mud	Diver: RM; Shore: HL
Gasperau (Alosa pseudoharengus)	2	1	5	BB080813TD	Seagrass	In	H	Gulf Region	Bouctouche	Atlantic	2	N 46°49'97	W 64°67'64	2013-08-08	Summer	2013	10:30:00	07:23:00	50	4	D	sheltered	mud	Diver: RM; Shore: HL
Mud Crab (Panopeus sp.)	2	6	3	BB080813TD	Seagrass	In	H	Gulf Region	Bouctouche	Atlantic	2	N 46°49'97	W 64°67'64	2013-08-08	Summer	2013	10:30:00	07:23:00	50	4	D	sheltered	mud	Diver: RM; Shore: HL
Atlantic Silver side (Menidia menidia)	1	12	2.5	BB080813TN	Seagrass	In	H	Gulf Region	Bouctouche	Atlantic	2	N 46°49'97	W 64°67'64	2013-08-08	Summer	2013	1900-01-01	07:23:00	50	4	N	sheltered	mud	Diver: RM; Shore: HL
Atlantic Silver side (Menidia menidia)	1	2	5	BB080813TN	Seagrass	In	H	Gulf Region	Bouctouche	Atlantic	2	N 46°49'97	W 64°67'64	2013-08-08	Summer	2013	1900-01-01	07:23:00	50	4	N	sheltered	mud	Diver: RM; Shore: HL
3-Spined Stickleback (Gasterosteus aculeatus)	1	1	1.5	BB080813TN	Seagrass	In	H	Gulf Region	Bouctouche	Atlantic	2	N 46°49'97	W 64°67'64	2013-08-08	Summer	2013	1900-01-01	07:23:00	50	4	N	sheltered	mud	Diver: RM; Shore: HL
American Eel (Anguilla rostrata)	1	1	50	BB080813TN	Seagrass	In	H	Gulf Region	Bouctouche	Atlantic	2	N 46°49'97	W 64°67'64	2013-08-08	Summer	2013	1900-01-01	07:23:00	50	4	N	sheltered	mud	Diver: RM; Shore: HL
Mud Crab (Panopeus sp.)	1	2	1.5	BB080813TN	Seagrass	In	H	Gulf Region	Bouctouche	Atlantic	2	N 46°49'97	W 64°67'64	2013-08-08	Summer	2013	1900-01-01	07:23:00	50	4	N	sheltered	mud	Diver: RM; Shore: HL
Stickleback sp.	2	2	2	BB080813TN	Seagrass	In	H	Gulf Region	Bouctouche	Atlantic	2	N 46°49'97	W 64°67'64	2013-08-08	Summer	2013	1900-01-01	07:23:00	50	4	N	sheltered	mud	Diver: RM; Shore: HL
Atlantic Silver side (Menidia menidia)	2	5	3	BB080813TN	Seagrass	In	H	Gulf Region	Bouctouche	Atlantic	2	N 46°49'97	W 64°67'64	2013-08-08	Summer	2013	1900-01-01	07:23:00	50	4	N	sheltered	mud	Diver: RM; Shore: HL
Atlantic Silver side (Menidia menidia)	2	1	5	BB080813TN	Seagrass	In	H	Gulf Region	Bouctouche	Atlantic	2	N 46°49'97	W 64°67'64	2013-08-08	Summer	2013	1900-01-01	07:23:00	50	4	N	sheltered	mud	Diver: RM; Shore: HL
Mud Crab (Panopeus sp.)	2	9	3	BB080813TN	Seagrass	In	H	Gulf Region	Bouctouche	Atlantic	2	N 46°49'97	W 64°67'64	2013-08-08	Summer	2013	1900-01-01	07:23:00	50	4	N	sheltered	mud	Diver: RM; Shore: HL
Atlantic Silver side (Menidia menidia)	1	5	6	KB080913TD	Seagrass	In	H	Gulf Region	Kouchibouguac National Park	Atlantic	2	N 46°84'16	W 64°93'77	2013-09-08	Summer	2013	10:15:00	07:26:00	50	4	D	sheltered	mud	Diver: RM; Shore: HL
Lady Crab (Ovalipes ocellatus)	1	1	4	KB080913TD	Seagrass	In	H	Gulf Region	Kouchibouguac National Park	Atlantic	2	N 46°84'16	W 64°93'77	2013-09-08	Summer	2013	10:15:00	07:26:00	50	4	D	sheltered	mud	Diver: RM; Shore: HL
Common star fish (Asterias vulgaris)	1	1	10	KB080913TD	Seagrass	In	H	Gulf Region	Kouchibouguac National Park	Atlantic	2	N 46°84'16	W 64°93'77	2013-09-08	Summer	2013	10:15:00	07:26:00	50	4	D	sheltered	mud	Diver: RM; Shore: HL
Atlantic Silver side (Menidia menidia)	2	20	3	KB080913TD	Seagrass	In	H	Gulf Region	Kouchibouguac National Park	Atlantic	2	N 46°84'16	W 64°93'77	2013-09-08	Summer	2013	10:15:00	07:26:00	50	4	D	sheltered	mud	Diver: RM; Shore: HL
4-Spine Stickle bach (Apeltes quadracus )	2	1	4	KB080913TD	Seagrass	In	H	Gulf Region	Kouchibouguac National Park	Atlantic	2	N 46°84'16	W 64°93'77	2013-09-08	Summer	2013	10:15:00	07:26:00	50	4	D	sheltered	mud	Diver: RM; Shore: HL
Smouth Flounder (Pleuronectes putnami)	2	1	15	KB080913TD	Seagrass	In	H	Gulf Region	Kouchibouguac National Park	Atlantic	2	N 46°84'16	W 64°93'77	2013-09-08	Summer	2013	10:15:00	07:26:00	50	4	D	sheltered	mud	Diver: RM; Shore: HL
Rock Crab (Cancer irroratus)	2	1	10	KB080913TD	Seagrass	In	H	Gulf Region	Kouchibouguac National Park	Atlantic	2	N 46°84'16	W 64°93'77	2013-09-08	Summer	2013	10:15:00	07:26:00	50	4	D	sheltered	mud	Diver: RM; Shore: HL
Rock Crab (Cancer irroratus)	2	1	4	KB080913TD	Seagrass	In	H	Gulf Region	Kouchibouguac National Park	Atlantic	2	N 46°84'16	W 64°93'77	2013-09-08	Summer	2013	10:15:00	07:26:00	50	4	D	sheltered	mud	Diver: RM; Shore: HL
Common star fish (Asterias vulgaris)	2	1	4	KB080913TD	Seagrass	In	H	Gulf Region	Kouchibouguac National Park	Atlantic	2	N 46°84'16	W 64°93'77	2013-09-08	Summer	2013	10:15:00	07:26:00	50	4	D	sheltered	mud	Diver: RM; Shore: HL
Common star fish (Asterias vulgaris)	2	1	10	KB080913TD	Seagrass	In	H	Gulf Region	Kouchibouguac National Park	Atlantic	2	N 46°84'16	W 64°93'77	2013-09-08	Summer	2013	10:15:00	07:26:00	50	4	D	sheltered	mud	Diver: RM; Shore: HL
Atlantic Silver side (Menidia menidia)	1	4	2.5	KB080913TN	Seagrass	In	H	Gulf Region	Kouchibouguac National Park	Atlantic	2	N 46°84'16	W 64°93'77	2013-09-08	Summer	2013	1 day, 0:30:00	07:26:00	50	4	N	sheltered	mud	Diver: RM; Shore: HL
Rock Crab (Cancer irroratus)	1	1	6	KB080913TN	Seagrass	In	H	Gulf Region	Kouchibouguac National Park	Atlantic	2	N 46°84'16	W 64°93'77	2013-09-08	Summer	2013	1 day, 0:30:00	07:26:00	50	4	N	sheltered	mud	Diver: RM; Shore: HL
3-Spined Stickleback (Gasterosteus aculeatus)	2	1	5	KB080913TN	Seagrass	In	H	Gulf Region	Kouchibouguac National Park	Atlantic	2	N 46°84'16	W 64°93'77	2013-09-08	Summer	2013	1 day, 0:30:00	07:26:00	50	4	N	sheltered	mud	Diver: RM; Shore: HL
Common star fish (Asterias vulgaris)	2	1	5	KB080913TN	Seagrass	In	H	Gulf Region	Kouchibouguac National Park	Atlantic	2	N 46°84'16	W 64°93'77	2013-09-08	Summer	2013	1 day, 0:30:00	07:26:00	50	4	N	sheltered	mud	Diver: RM; Shore: HL
Common star fish (Asterias vulgaris)	2	1	10	KB080913TN	Seagrass	In	H	Gulf Region	Kouchibouguac National Park	Atlantic	2	N 46°84'16	W 64°93'77	2013-09-08	Summer	2013	1 day, 0:30:00	07:26:00	50	4	N	sheltered	mud	Diver: RM; Shore: HL
4-Spine Stickle bach (Apeltes quadracus )	1	1	3.5	SS081213TD	Seagrass	In	H	Gulf Region	Baie St. Simon Sud	Atlantic	1	N 47°73'20	W 64°77'56	2013-12-08	Summer	2013	10:15:00	07:52:00	50	4	D	sheltered	mud	Diver: RM; Shore: HL
Mummichog (Fundulus heteroclitus)	1	1	2	SS081213TD	Seagrass	In	H	Gulf Region	Baie St. Simon Sud	Atlantic	1	N 47°73'20	W 64°77'56	2013-12-08	Summer	2013	10:15:00	07:52:00	50	4	D	sheltered	mud	Diver: RM; Shore: HL
Rock Crab (Cancer irroratus)	1	1	2	SS081213TD	Seagrass	In	H	Gulf Region	Baie St. Simon Sud	Atlantic	1	N 47°73'20	W 64°77'56	2013-12-08	Summer	2013	10:15:00	07:52:00	50	4	D	sheltered	mud	Diver: RM; Shore: HL
4-Spine Stickle bach (Apeltes quadracus )	2	1	3	SS081213TD	Seagrass	In	H	Gulf Region	Baie St. Simon Sud	Atlantic	1	N 47°73'20	W 64°77'56	2013-12-08	Summer	2013	10:15:00	07:52:00	50	4	D	sheltered	mud	Diver: RM; Shore: HL
Rock Crab (Cancer irroratus)	2	1	10	SS081213TD	Seagrass	In	H	Gulf Region	Baie St. Simon Sud	Atlantic	1	N 47°73'20	W 64°77'56	2013-12-08	Summer	2013	10:15:00	07:52:00	50	4	D	sheltered	mud	Diver: RM; Shore: HL
Rock Crab (Cancer irroratus)	2	1	7	SS081213TD	Seagrass	In	H	Gulf Region	Baie St. Simon Sud	Atlantic	1	N 47°73'20	W 64°77'56	2013-12-08	Summer	2013	10:15:00	07:52:00	50	4	D	sheltered	mud	Diver: RM; Shore: HL
Rock Crab (Cancer irroratus)	2	2	6	SS081213TD	Seagrass	In	H	Gulf Region	Baie St. Simon Sud	Atlantic	1	N 47°73'20	W 64°77'56	2013-12-08	Summer	2013	10:15:00	07:52:00	50	4	D	sheltered	mud	Diver: RM; Shore: HL
Black Spotted Stickleback (Gasterosteus wheatlandi)	2	1	3.5	SS081213TD	Seagrass	In	H	Gulf Region	Baie St. Simon Sud	Atlantic	1	N 47°73'20	W 64°77'56	2013-12-08	Summer	2013	10:15:00	07:52:00	50	4	D	sheltered	mud	Diver: RM; Shore: HL
Rock Crab (Cancer irroratus)	1	1	4	SS081213TN	Seagrass	In	H	Gulf Region	Baie St. Simon Sud	Atlantic	1	N 47°73'20	W 64°77'56	2013-12-08	Summer	2013	22:00:00	07:52:00	50	4	N	sheltered	mud	Diver: RM; Shore: HL
Mummichog (Fundulus heteroclitus)	1	1	10	SS081213TN	Seagrass	In	H	Gulf Region	Baie St. Simon Sud	Atlantic	1	N 47°73'20	W 64°77'56	2013-12-08	Summer	2013	22:00:00	07:52:00	50	4	N	sheltered	mud	Diver: RM; Shore: HL
Cunner (Tautogolabrus adspersus)	1	1	6	SS081213TN	Seagrass	In	H	Gulf Region	Baie St. Simon Sud	Atlantic	1	N 47°73'20	W 64°77'56	2013-12-08	Summer	2013	22:00:00	07:52:00	50	4	N	sheltered	mud	Diver: RM; Shore: HL
Rock Crab (Cancer irroratus)	2	3	5	SS081213TN	Seagrass	In	H	Gulf Region	Baie St. Simon Sud	Atlantic	1	N 47°73'20	W 64°77'56	2013-12-08	Summer	2013	22:00:00	07:52:00	50	4	N	sheltered	mud	Diver: RM; Shore: HL
Mummichog (Fundulus heteroclitus)	2	1	4	SS081213TN	Seagrass	In	H	Gulf Region	Baie St. Simon Sud	Atlantic	1	N 47°73'20	W 64°77'56	2013-12-08	Summer	2013	22:00:00	07:52:00	50	4	N	sheltered	mud	Diver: RM; Shore: HL
Mummichog (Fundulus heteroclitus)	1	5	1.5	LM081313TD	Seagrass	In	H	Gulf Region	Lamèque	Atlantic	1	47°79'55	64°67'52	13/8/2013	Summer	2013	10:05:00	08:33:00	50	4	D	sheltered	mud	Diver: RM; Shore: HL
Black Spotted Stickleback (Gasterosteus wheatlandi)	1	2	2.5	LM081313TD	Seagrass	In	H	Gulf Region	Lamèque	Atlantic	1	47°79'55	64°67'52	13/8/2013	Summer	2013	10:05:00	08:33:00	50	4	D	sheltered	mud	Diver: RM; Shore: HL
4-Spine Stickle bach (Apeltes quadracus )	1	1	4	LM081313TD	Seagrass	In	H	Gulf Region	Lamèque	Atlantic	1	47°79'55	64°67'52	13/8/2013	Summer	2013	10:05:00	08:33:00	50	4	D	sheltered	mud	Diver: RM; Shore: HL
Rock Crab (Cancer irroratus)	1	1	10	LM081313TD	Seagrass	In	H	Gulf Region	Lamèque	Atlantic	1	47°79'55	64°67'52	13/8/2013	Summer	2013	10:05:00	08:33:00	50	4	D	sheltered	mud	Diver: RM; Shore: HL
Rock Crab (Cancer irroratus)	1	3	6	LM081313TD	Seagrass	In	H	Gulf Region	Lamèque	Atlantic	1	47°79'55	64°67'52	13/8/2013	Summer	2013	10:05:00	08:33:00	50	4	D	sheltered	mud	Diver: RM; Shore: HL
Rock Crab (Cancer irroratus)	1	1	4	LM081313TD	Seagrass	In	H	Gulf Region	Lamèque	Atlantic	1	47°79'55	64°67'52	13/8/2013	Summer	2013	10:05:00	08:33:00	50	4	D	sheltered	mud	Diver: RM; Shore: HL
Rock Crab (Cancer irroratus)	2	1	10	LM081313TD	Seagrass	In	H	Gulf Region	Lamèque	Atlantic	1	47°79'55	64°67'52	13/8/2013	Summer	2013	10:05:00	08:33:00	50	4	D	sheltered	mud	Diver: RM; Shore: HL
Rock Crab (Cancer irroratus)	2	1	7	LM081313TD	Seagrass	In	H	Gulf Region	Lamèque	Atlantic	1	47°79'55	64°67'52	13/8/2013	Summer	2013	10:05:00	08:33:00	50	4	D	sheltered	mud	Diver: RM; Shore: HL
Mummichog (Fundulus heteroclitus)	2	2	1.5	LM081313TD	Seagrass	In	H	Gulf Region	Lamèque	Atlantic	1	47°79'55	64°67'52	13/8/2013	Summer	2013	10:05:00	08:33:00	50	4	D	sheltered	mud	Diver: RM; Shore: HL
Smouth Flounder (Pleuronectes putnami)	2	1	3.5	LM081313TD	Seagrass	In	H	Gulf Region	Lamèque	Atlantic	1	47°79'55	64°67'52	13/8/2013	Summer	2013	10:05:00	08:33:00	50	4	D	sheltered	mud	Diver: RM; Shore: HL
Black Spotted Stickleback (Gasterosteus wheatlandi)	2	1	2.5	LM081313TD	Seagrass	In	H	Gulf Region	Lamèque	Atlantic	1	47°79'55	64°67'52	13/8/2013	Summer	2013	10:05:00	08:33:00	50	4	D	sheltered	mud	Diver: RM; Shore: HL
4-Spine Stickle bach (Apeltes quadracus )	2	1	4	LM081313TD	Seagrass	In	H	Gulf Region	Lamèque	Atlantic	1	47°79'55	64°67'52	13/8/2013	Summer	2013	10:05:00	08:33:00	50	4	D	sheltered	mud	Diver: RM; Shore: HL
Rock Crab (Cancer irroratus)	1	1	10	LM081313TN	Seagrass	In	H	Gulf Region	Lamèque	Atlantic	1	47°79'55	64°67'52	13/8/2013	Summer	2013	21:00:00	08:33:00	50	4	N	sheltered	mud	Diver: RM; Shore: HL
Rock Crab (Cancer irroratus)	1	2	5	LM081313TN	Seagrass	In	H	Gulf Region	Lamèque	Atlantic	1	47°79'55	64°67'52	13/8/2013	Summer	2013	21:00:00	08:33:00	50	4	N	sheltered	mud	Diver: RM; Shore: HL
Gasperau (Alosa pseudoharengus)	1	1	12	LM081313TN	Seagrass	In	H	Gulf Region	Lamèque	Atlantic	1	47°79'55	64°67'52	13/8/2013	Summer	2013	21:00:00	08:33:00	50	4	N	sheltered	mud	Diver: RM; Shore: HL
Gasperau (Alosa pseudoharengus)	1	1	5	LM081313TN	Seagrass	In	H	Gulf Region	Lamèque	Atlantic	1	47°79'55	64°67'52	13/8/2013	Summer	2013	21:00:00	08:33:00	50	4	N	sheltered	mud	Diver: RM; Shore: HL
Mummichog (Fundulus heteroclitus)	1	1	2	LM081313TN	Seagrass	In	H	Gulf Region	Lamèque	Atlantic	1	47°79'55	64°67'52	13/8/2013	Summer	2013	21:00:00	08:33:00	50	4	N	sheltered	mud	Diver: RM; Shore: HL
Atlantic Silver side (Menidia menidia)	2	1	2	LM081313TN	Seagrass	In	H	Gulf Region	Lamèque	Atlantic	1	47°79'55	64°67'52	13/8/2013	Summer	2013	21:00:00	08:33:00	50	4	N	sheltered	mud	Diver: RM; Shore: HL
Atlantic Silver side (Menidia menidia)	2	1	3	LM081313TN	Seagrass	In	H	Gulf Region	Lamèque	Atlantic	1	47°79'55	64°67'52	13/8/2013	Summer	2013	21:00:00	08:33:00	50	4	N	sheltered	mud	Diver: RM; Shore: HL
Atlantic Silver side (Menidia menidia)	2	1	4	LM081313TN	Seagrass	In	H	Gulf Region	Lamèque	Atlantic	1	47°79'55	64°67'52	13/8/2013	Summer	2013	21:00:00	08:33:00	50	4	N	sheltered	mud	Diver: RM; Shore: HL
Atlantic Silver side (Menidia menidia)	2	5	7.5	LM081313TN	Seagrass	In	H	Gulf Region	Lamèque	Atlantic	1	47°79'55	64°67'52	13/8/2013	Summer	2013	21:00:00	08:33:00	50	4	N	sheltered	mud	Diver: RM; Shore: HL
Rock Crab (Cancer irroratus)	2	1	5	LM081313TN	Seagrass	In	H	Gulf Region	Lamèque	Atlantic	1	47°79'55	64°67'52	13/8/2013	Summer	2013	21:00:00	08:33:00	50	4	N	sheltered	mud	Diver: RM; Shore: HL
Rock Crab (Cancer irroratus)	2	2	8	LM081313TN	Seagrass	In	H	Gulf Region	Lamèque	Atlantic	1	47°79'55	64°67'52	13/8/2013	Summer	2013	21:00:00	08:33:00	50	4	N	sheltered	mud	Diver: RM; Shore: HL
Mummichog (Fundulus heteroclitus)	2	1	2	LM081313TN	Seagrass	In	H	Gulf Region	Lamèque	Atlantic	1	47°79'55	64°67'52	13/8/2013	Summer	2013	21:00:00	08:33:00	50	4	N	sheltered	mud	Diver: RM; Shore: HL
Atlantic Silver side (Menidia menidia)	1	1	10	RB081013	Seagrass	In	H	Gulf Region	Richubucto	Atlantic	2			2013-10-08	Summer	2013	11:20:00	07:53:00	50	4	D	sheltered	mud	Diver: RM; Shore: HL
Atlantic Silver side (Menidia menidia)	1	46	6	RB081013	Seagrass	In	H	Gulf Region	Richubucto	Atlantic	2			2013-10-08	Summer	2013	11:20:00	07:53:00	50	4	D	sheltered	mud	Diver: RM; Shore: HL
Rock Crab (Cancer irroratus)	1	2	6	RB081013	Seagrass	In	H	Gulf Region	Richubucto	Atlantic	2			2013-10-08	Summer	2013	11:20:00	07:53:00	50	4	D	sheltered	mud	Diver: RM; Shore: HL
Rock Crab (Cancer irroratus)	1	1	4	RB081013	Seagrass	In	H	Gulf Region	Richubucto	Atlantic	2			2013-10-08	Summer	2013	11:20:00	07:53:00	50	4	D	sheltered	mud	Diver: RM; Shore: HL
4-Spine Stickle bach (Apeltes quadracus )	1	1	3	RB081013	Seagrass	In	H	Gulf Region	Richubucto	Atlantic	2			2013-10-08	Summer	2013	11:20:00	07:53:00	50	4	D	sheltered	mud	Diver: RM; Shore: HL
4-Spine Stickle bach (Apeltes quadracus )	1	1	3.5	RB081013	Seagrass	In	H	Gulf Region	Richubucto	Atlantic	2			2013-10-08	Summer	2013	11:20:00	07:53:00	50	4	D	sheltered	mud	Diver: RM; Shore: HL
Cunner (Tautogolabrus adspersus)	1	1	10	RB081013	Seagrass	In	H	Gulf Region	Richubucto	Atlantic	2			2013-10-08	Summer	2013	11:20:00	07:53:00	50	4	D	sheltered	mud	Diver: RM; Shore: HL
Atlantic Silver side (Menidia menidia)	2	1	8	RB081013	Seagrass	In	H	Gulf Region	Richubucto	Atlantic	2			2013-10-08	Summer	2013	11:20:00	07:53:00	50	4	D	sheltered	mud	Diver: RM; Shore: HL
Atlantic Silver side (Menidia menidia)	2	179	6	RB081013	Seagrass	In	H	Gulf Region	Richubucto	Atlantic	2			2013-10-08	Summer	2013	11:20:00	07:53:00	50	4	D	sheltered	mud	Diver: RM; Shore: HL
Rock Crab (Cancer irroratus)	2	1	6	RB081013	Seagrass	In	H	Gulf Region	Richubucto	Atlantic	2			2013-10-08	Summer	2013	11:20:00	07:53:00	50	4	D	sheltered	mud	Diver: RM; Shore: HL
Mummichog (Fundulus heteroclitus)	2	1	8	RB081013	Seagrass	In	H	Gulf Region	Richubucto	Atlantic	2			2013-10-08	Summer	2013	11:20:00	07:53:00	50	4	D	sheltered	mud	Diver: RM; Shore: HL
4-Spine Stickle bach (Apeltes quadracus )	2	2	3	RB081013	Seagrass	In	H	Gulf Region	Richubucto	Atlantic	2			2013-10-08	Summer	2013	11:20:00	07:53:00	50	4	D	sheltered	mud	Diver: RM; Shore: HL
4-Spine Stickle bach (Apeltes quadracus )	2	1	4	RB081013	Seagrass	In	H	Gulf Region	Richubucto	Atlantic	2			2013-10-08	Summer	2013	11:20:00	07:53:00	50	4	D	sheltered	mud	Diver: RM; Shore: HL
4-Spine Stickle bach (Apeltes quadracus )	2	1	2	RB081013	Seagrass	In	H	Gulf Region	Richubucto	Atlantic	2			2013-10-08	Summer	2013	11:20:00	07:53:00	50	4	D	sheltered	mud	Diver: RM; Shore: HL
Black Spotted Stickleback (Gasterosteus wheatlandi)	2	1	4	RB081013	Seagrass	In	H	Gulf Region	Richubucto	Atlantic	2			2013-10-08	Summer	2013	11:20:00	07:53:00	50	4	D	sheltered	mud	Diver: RM; Shore: HL
Cunner (Tautogolabrus adspersus)	2	1	9	RB081013	Seagrass	In	H	Gulf Region	Richubucto	Atlantic	2			2013-10-08	Summer	2013	11:20:00	07:53:00	50	4	D	sheltered	mud	Diver: RM; Shore: HL
Rock Crab (Cancer irroratus)	1	4	6	TB110813TD	Seagrass	In	L	New Brunswick	Tabusintac	Gulf of St Lawrence	1	N 47°22'56	W 64°56'21	2013-11-08	Summer	2013	10:05:00	08:39:00	50	4	D	sheltered	mud	Diver: RM; Shore: HL
Rock Crab (Cancer irroratus)	1	2	5	TB110813TD	Seagrass	In	L	New Brunswick	Tabusintac	Gulf of St Lawrence	1	N 47°22'56	W 64°56'21	2013-11-08	Summer	2013	10:05:00	08:39:00	50	4	D	sheltered	mud	Diver: RM; Shore: HL
Rock Crab (Cancer irroratus)	1	3	7	TB110813TD	Seagrass	In	L	New Brunswick	Tabusintac	Gulf of St Lawrence	1	N 47°22'56	W 64°56'21	2013-11-08	Summer	2013	10:05:00	08:39:00	50	4	D	sheltered	mud	Diver: RM; Shore: HL
Rock Crab (Cancer irroratus)	2	1	6	TB110813TD	Seagrass	In	L	New Brunswick	Tabusintac	Gulf of St Lawrence	1	N 47°22'56	W 64°56'21	2013-11-08	Summer	2013	10:05:00	08:39:00	50	4	D	sheltered	mud	Diver: RM; Shore: HL
Atlantic Silver side (Menidia menidia)	2	2	2	TB110813TD	Seagrass	In	L	New Brunswick	Tabusintac	Gulf of St Lawrence	1	N 47°22'56	W 64°56'21	2013-11-08	Summer	2013	10:05:00	08:39:00	50	4	D	sheltered	mud	Diver: RM; Shore: HL
4-Spine Stickle bach (Apeltes quadracus )	2	1	3	TB110813TN	Seagrass	In	L	New Brunswick	Tabusintac	Gulf of St Lawrence	1	N 47°22'56	W 64°56'21	2013-11-08	Summer	2013	22:00:00	08:39:00	50	4	N	sheltered	mud	Diver: RM; Shore: HL
										g

## Sheet: habitat comparison
Location	Habitat	Transect	ID	Black Spotted Stickleback (Gasterosteus wheatlandi)	3-Spined Stickleback (Gasterosteus aculeatus)	4-Spine Stickleback (Apeltes quadracus )	9-Spine Stickleback (Pungitius pungitius)	Mummichog (Fundulus heteroclitus)	Atlantic Silver side (Menidia menidia)	Flounder sp. (Pleuronectes sp.)	Striped Bass	Cunner (Tautogolabrus adspersus)	Rock Crab (Cancer irroratus)	Green Crab (Carcinus maenas)	Mud Crab (Panopeus sp.)	American Sand Lance (Ammodytes americanus)	Gasperau (Alosa pseudoharengus)	Lady Crab (Ovalipes ocellatus)	Grubby (Myoxocephalus aenaeus)	Common star fish (Asterias vulgaris)
Cocagne	nearshore	1	CH1S1	0	0	0	0.0025	0.01	0.0125	0	0	0	0.0025	0	0.005	0	0	0	0	0
Cocagne	nearshore	2	CH1S2	0	0	0	0	0	0.185	0	0	0	0	0.0025	0.0025	0	0	0.0025	0	0
Bouctouche	nearshore	1	BBS1	0	0	0.005	0.0075	0.06	0.03	0	0	0	0.0025	0.0025	0.0025	0	0	0	0.005	0
Bouctouche	nearshore	2	BBS2	0	0	0.02	0.0025	0.015	0.01	0	0	0	0	0	0	0	0	0	0	0
Kouchibouguac	nearshore	1	KBS1	0	0	0	0	0.005	0	0	0	0	0	0	0	0	0	0	0	0
Kouchibouguac	nearshore	2	KBS2	0	0	0	0	0	0	0	0	0	0	0	0	0	0	0	0	0
San Simon	nearshore	1	SSS1	0	0	0	0	0.0025	0.0025	0	0	0	0	0	0	0	0	0	0	0
San Simon	nearshore	2	SSS2	0	0	0	0	0.0025	0	0	0	0	0	0	0	0	0	0	0	0
Lameque	nearshore	1	LMS1	0	0	0	0	0	0	0	0	0	0	0	0	0	0	0	0	0
Lameque	nearshore	2	LMS2	0	0	0	0	0.0075	0	0.0025	0	0	0	0	0	0	0	0	0	0
Cocagne	eelgrass	1	CH1D1	0	0	0.0025	0.0075	0.0075	1.385	0.0025	0	0	0	0	0	0	0	0	0	0
Cocagne	eelgrass	2	CH1D2	0	0	0.015	0	0	0.65	0.0025	0	0	0	0	0	0	0	0	0	0
Bouctouche	eelgrass	1	BBD1	0	0	0.0075	0.01	0.0025	0.4075	0	0	0	0	0	0.02	0	0	0	0	0
Bouctouche	eelgrass	2	BBD2	0	0	0.0075	0	0.0025	0.4025	0	0	0	0	0	0.0175	0	0.0025	0	0	0
Kouchibouguac	eelgrass	1	KBD1	0	0	0	0	0	0.0125	0	0	0	0	0	0	0	0	0.0025	0	0.0025
Kouchibouguac	eelgrass	2	KBD2	0	0	0.0025	0	0	0.05	0.0025	0	0	0.005	0	0	0	0	0	0	0.005
San Simon	eelgrass	1	SSD1	0	0	0.0025	0	0.0025	0	0	0	0	0.0025	0	0	0	0	0	0	0
San Simon	eelgrass	2	SSD2	0.0025	0	0.0025	0	0	0	0	0	0	0.01	0	0	0	0	0	0	0
Lameque	eelgrass	1	LMD1	0.005	0	0.0025	0	0.0125	0	0	0	0	0.0125	0	0	0	0	0	0	0
Lameque	eelgrass	2	LMD2	0.0025	0	0.0025	0	0.005	0	0.0025	0	0	0.005	0	0	0	0	0	0	0
